# Supplementary material
Source: Springer Nature journal article supplement (https://www.springermedizin.de/resource/supplementary/13058_2011_2901_MOESM5_ESM.pdf/9702820)

**HBC-21 patient****A**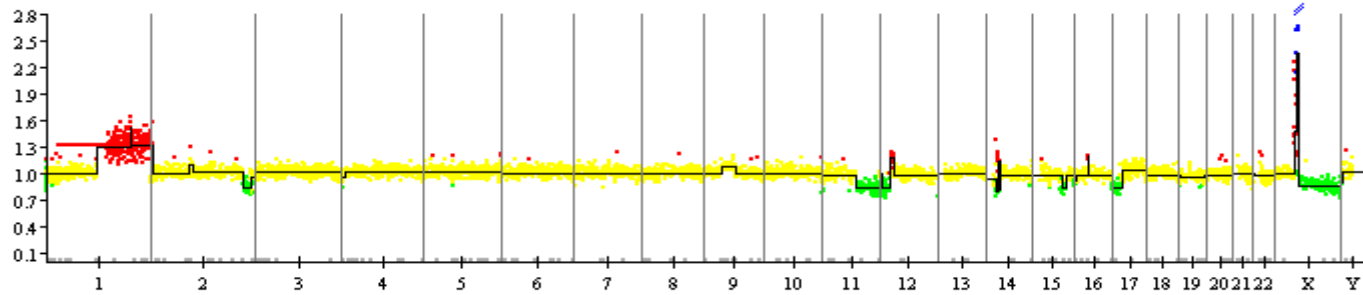**HBCx-21 xenograft**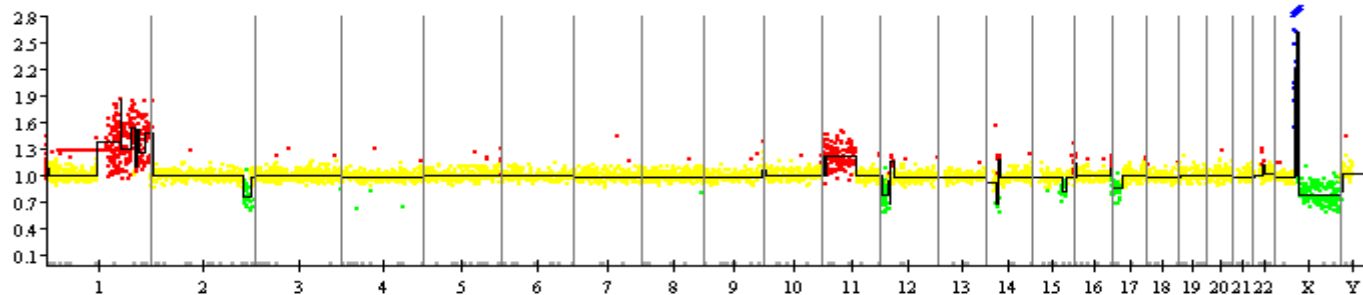**B****HBC-31 patient**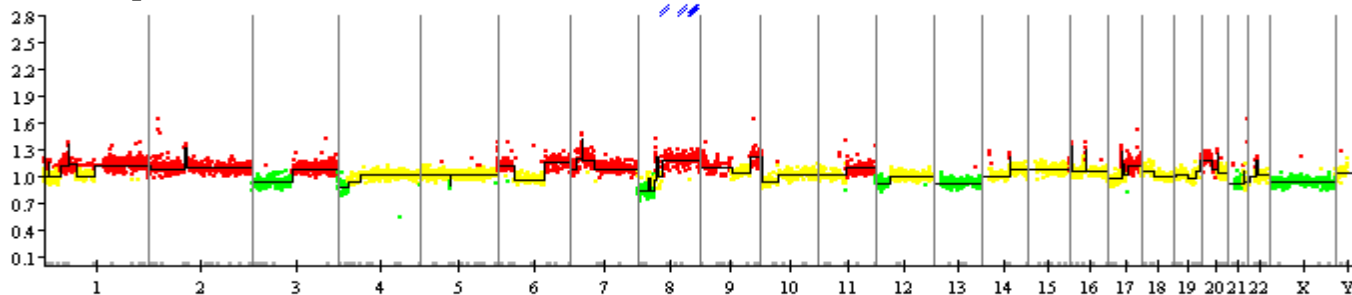**HBCx-31 xenograft**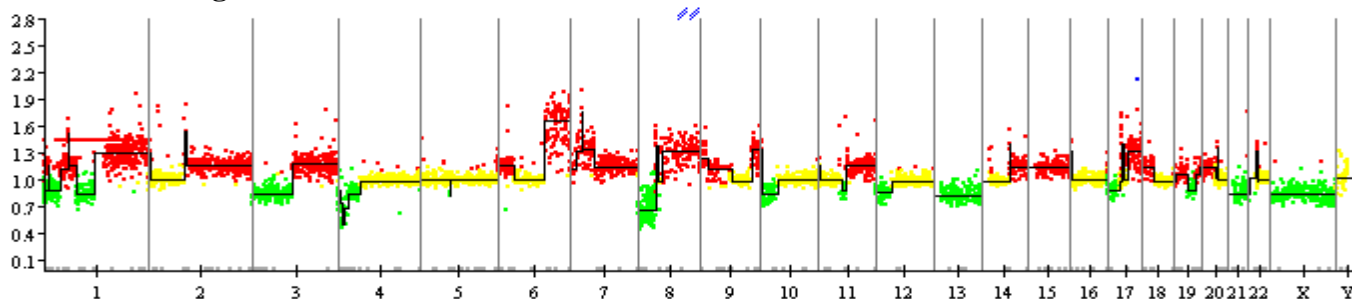

Supplement: MOESM5 [file 9702820]
